# Supplementary material
Source: Royal Society of Chemistry journal article supplement (doi:10.1039/d6ja00053c)
Supplement: d6ja00053c1.pdf [file d6ja00053c1.pdf]

## Supplementary Tables

**Supplementary table 1: Primary Analytical Results of Sedimentary Reference Materials**

| Material Description                                          | Replicate Number                   | Sulphur (wt. %) | $\delta^{34}\text{S}_{\text{VCDT}}$ (‰) | Material Description                                       | Number of Analyses                 | Sulphur (wt. %)                   | $\delta^{34}\text{S}_{\text{VCDT}}$ (‰) | Material Description                                     | Number of Analyses                 | Sulphur (wt. %) | $\delta^{34}\text{S}_{\text{VCDT}}$ (‰) |
|---------------------------------------------------------------|------------------------------------|-----------------|-----------------------------------------|------------------------------------------------------------|------------------------------------|-----------------------------------|-----------------------------------------|----------------------------------------------------------|------------------------------------|-----------------|-----------------------------------------|
| <b>GSJ JMS-1</b><br>(Modern Shallow Marine Surface Sediments) | 1                                  | 1.25            | -18.47                                  | <b>GSJ JMS-2</b><br>(Modern Deep Marine Surface Sediments) | 1                                  | 0.24                              | -                                       | <b>USGS SBC-1</b><br>(Ancient Organic Rich Marine Shale) | 1                                  | 0.69            | -39.33                                  |
|                                                               | 2                                  | 1.29            | -18.85                                  |                                                            | 2                                  | 0.30                              | -                                       |                                                          | 2                                  | 0.69            | -39.25                                  |
|                                                               | 3                                  | 1.28            | -19.11                                  |                                                            | 3                                  | 0.32                              | -                                       |                                                          | 3                                  | 0.71            | -38.96                                  |
|                                                               | 4                                  | 1.33            | -18.95                                  |                                                            | 4                                  | 0.35                              | 20.99                                   |                                                          | 4                                  | 0.66            | -39.59                                  |
|                                                               | 5                                  | 1.32            | -19.26                                  |                                                            | 5                                  | 0.33                              | 21.63                                   |                                                          | 5                                  | 0.68            | -40.04                                  |
|                                                               | 6                                  | 1.32            | -19.22                                  |                                                            | 6                                  | 0.34                              | 21.84                                   |                                                          | 6                                  | 0.69            | -39.80                                  |
|                                                               | 7                                  | 1.31            | -19.33                                  |                                                            | 7                                  | 0.34                              | 21.88                                   |                                                          | 7                                  | 0.68            | -38.85                                  |
|                                                               | 8                                  | 1.33            | -19.12                                  |                                                            | 8                                  | 0.34                              | 22.00                                   |                                                          | 8                                  | 0.70            | -38.82                                  |
|                                                               | 9                                  | 1.32            | -19.18                                  |                                                            | 9                                  | 0.29                              | 21.88                                   |                                                          | 9                                  | 0.67            | -39.81                                  |
|                                                               | 10                                 | 1.33            | -18.96                                  |                                                            | 10                                 | 0.35                              | 22.08                                   |                                                          | 10                                 | 0.69            | -39.78                                  |
|                                                               | 11                                 | 1.33            | -19.22                                  |                                                            | 11                                 | 0.32                              | 22.04                                   |                                                          | 11                                 | 0.70            | -38.56                                  |
|                                                               | 12                                 | 1.31            | -19.13                                  |                                                            | 12                                 | 0.33                              | 21.96                                   |                                                          | 12                                 | 0.70            | -39.31                                  |
|                                                               | Mean                               | 1.31            | -19.07                                  |                                                            | Mean                               | 0.32                              | 21.81                                   |                                                          | Mean                               | 0.69            | -39.34                                  |
| Reproducibility ( $\pm 1\sigma$ )                             | 0.03                               | 0.24            | Reproducibility ( $\pm 1\sigma$ )       | 0.03                                                       | 0.33                               | Reproducibility ( $\pm 1\sigma$ ) | 0.02                                    | 0.47                                                     |                                    |                 |                                         |
|                                                               | Relative Standard Deviation (%RSD) | 1.95            | -                                       |                                                            | Relative Standard Deviation (%RSD) | 9.99                              | -                                       |                                                          | Relative Standard Deviation (%RSD) | 2.22            | -                                       |
|                                                               | Total Number of Analyses           | 12              | 12                                      |                                                            | Total Number of Analyses           | 12                                | 9                                       |                                                          | Total Number of Analyses           | 12              | 12                                      |
|                                                               | Standard Error                     | 0.01            | 0.07                                    |                                                            | Standard Error                     | 0.01                              | 0.11                                    |                                                          | Standard Error                     | 0.00            | 0.1                                     |

**Supplementary table 2: Repeated Analytical Results of GSJ JMS–2 (Sedimentary Reference Material)**

| Batch    | Replicate Number                   | Sulphur (wt. %) | $\delta^{34}\text{S}_{\text{VCDT}}$ (‰) | Batch    | Number of Analyses                 | Sulphur (wt. %) | $\delta^{34}\text{S}_{\text{VCDT}}$ (‰) |
|----------|------------------------------------|-----------------|-----------------------------------------|----------|------------------------------------|-----------------|-----------------------------------------|
| <b>1</b> | 1                                  | 0.28            | 20.74                                   | <b>2</b> | 1                                  | 0.33            |                                         |
|          | 2                                  | 0.26            | 21.22                                   |          | 2                                  | 0.29            | 21.73                                   |
|          | 3                                  | 0.27            | 21.26                                   |          | 3                                  | 0.29            | 21.53                                   |
|          | 4                                  | 0.26            | 21.38                                   |          | 4                                  | 0.29            | 21.58                                   |
|          | –                                  | –               | –                                       |          | 5                                  | 0.30            | 21.44                                   |
|          | Mean                               | 0.27            | 21.15                                   |          | Mean                               | 0.30            | 21.57                                   |
|          | Reproducibility ( $\pm 1\sigma$ )  | 0.01            | 0.25                                    |          | Reproducibility ( $\pm 1\sigma$ )  | 0.02            | 0.10                                    |
|          | Relative Standard Deviation (%RSD) | 2.83            | –                                       |          | Relative Standard Deviation (%RSD) | 5.32            | –                                       |
|          | Total Number of Analyses           | 4               | 4                                       |          | Total Number of Analyses           | 5               | 5                                       |
|          | Standard Error                     | 0.00            | 0.12                                    |          | Standard Error                     | 0.01            | 0.05                                    |

**Supplementary table 3: Primary Analytical Results of Magmatic Reference Materials**

| Material Description                                                          | Replicate Number                  | Sulphur (wt. %)                    | $\delta^{34}\text{S}_{\text{VCDT}}$ (‰) | Material Description                                               | Number of Analyses                | Sulphur (wt. %)                    | $\delta^{34}\text{S}_{\text{VCDT}}$ (‰) | Material Description                                                                       | Number of Analyses                | Sulphur (wt. %)                    | $\delta^{34}\text{S}_{\text{VCDT}}$ (‰) |
|-------------------------------------------------------------------------------|-----------------------------------|------------------------------------|-----------------------------------------|--------------------------------------------------------------------|-----------------------------------|------------------------------------|-----------------------------------------|--------------------------------------------------------------------------------------------|-----------------------------------|------------------------------------|-----------------------------------------|
| <b>USGS WMS-1a</b><br>(Mafi-ultramafic hosted Massive Ni-Cu-Co-PGE Sulphides) | 1                                 | 25.79                              | -3.49                                   | <b>UGSG WMG-1a</b><br>(Au-PGE Bearing Sulphide Mineralised Gabbro) | 1                                 | 3.48                               | -4.25                                   | <b>USGS PTM-1a</b><br>(Sudbury Igneous Complex Hosted Noble Metal Bearing Ni-Cu Sulphides) | 1                                 | 22.64                              | 4.10                                    |
|                                                                               | 2                                 | 27.25                              | -3.49                                   |                                                                    | 2                                 | 3.36                               | -4.04                                   |                                                                                            | 2                                 | 22.48                              | 3.49                                    |
|                                                                               | 3                                 | 27.13                              | -3.50                                   |                                                                    | 3                                 | 3.51                               | -4.45                                   |                                                                                            | 3                                 | 22.98                              | 3.89                                    |
|                                                                               | 4                                 | 26.28                              | -3.66                                   |                                                                    | 4                                 | 3.31                               | -4.18                                   |                                                                                            | 4                                 | 22.26                              | 3.62                                    |
|                                                                               | 5                                 | 26.33                              | -3.45                                   |                                                                    | 5                                 | 3.42                               | -4.56                                   |                                                                                            | 5                                 | 23.00                              | 4.10                                    |
|                                                                               | 6                                 | 26.43                              | -3.72                                   |                                                                    | 6                                 | 3.46                               | -4.29                                   |                                                                                            | 6                                 | 22.59                              | 3.56                                    |
|                                                                               | 7                                 | 27.33                              | -3.46                                   |                                                                    | 7                                 | 3.53                               | -4.61                                   |                                                                                            | 7                                 | 22.25                              | 4.10                                    |
|                                                                               | 8                                 | 25.76                              | -3.75                                   |                                                                    | 8                                 | 3.46                               | -4.21                                   |                                                                                            | 8                                 | 22.68                              | 3.61                                    |
|                                                                               | 9                                 | 26.39                              | -3.24                                   |                                                                    | 9                                 | 3.37                               | -4.71                                   |                                                                                            | 9                                 | 22.37                              | 4.07                                    |
|                                                                               | 10                                | 24.64                              | -3.60                                   |                                                                    | 10                                | 3.49                               | -4.16                                   |                                                                                            | 10                                | 22.52                              | 3.58                                    |
|                                                                               | 11                                | 25.96                              | -3.35                                   |                                                                    | 11                                | 3.32                               | -4.70                                   |                                                                                            | 11                                | 21.76                              | 4.27                                    |
|                                                                               | 12                                | 26.31                              | -3.85                                   |                                                                    | 12                                | 3.46                               | -4.34                                   |                                                                                            | 12                                | 22.54                              | 3.63                                    |
|                                                                               | Mean                              | 26.30                              | -3.55                                   |                                                                    | Mean                              | 3.43                               | -4.38                                   |                                                                                            | Mean                              | 22.51                              | 3.84                                    |
|                                                                               | Reproducibility ( $\pm 1\sigma$ ) | 0.75                               | 0.17                                    |                                                                    | Reproducibility ( $\pm 1\sigma$ ) | 0.07                               | 0.23                                    |                                                                                            | Reproducibility ( $\pm 1\sigma$ ) | 0.33                               | 0.28                                    |
|                                                                               |                                   | Relative Standard Deviation (%RSD) | 2.84                                    |                                                                    | -                                 | Relative Standard Deviation (%RSD) | 2.14                                    |                                                                                            | -                                 | Relative Standard Deviation (%RSD) | 1.48                                    |
|                                                                               | Total Number of Analyses          | 12                                 | 12                                      | Total Number of Analyses                                           | 12                                | 12                                 | Total Number of Analyses                | 12                                                                                         | 12                                |                                    |                                         |
|                                                                               | Standard Error                    | 0.22                               | 0.05                                    | Standard Error                                                     | 0.02                              | 0.06                               | Standard Error                          | 0.10                                                                                       | 0.0                               |                                    |                                         |

Continued.....

| Material Description                                                     | Replicate Number | Sulphur (wt. %) | $\delta^{34}\text{S}_{\text{VCDT}}$ (‰) | Material Description                                               | Number of Analyses | Sulphur (wt. %) | $\delta^{34}\text{S}_{\text{VCDT}}$ (‰) |
|--------------------------------------------------------------------------|------------------|-----------------|-----------------------------------------|--------------------------------------------------------------------|--------------------|-----------------|-----------------------------------------|
| <b>USGS SU-1b</b><br>(Sudbury Igneous Complex Hosted Ni-Cu-Co Sulphides) | 1                | 12.78           | 4.09                                    | <b>USGS PTC-1b</b><br>(Au-PGE Bearing Sulphide Mineralised Gabbro) | 1                  | 28.01           | 2.57                                    |
|                                                                          | 2                | 12.77           | 3.71                                    |                                                                    | 2                  | 29.38           | 2.52                                    |
|                                                                          | 3                | 13.11           | 4.36                                    |                                                                    | 3                  | 28.29           | 2.76                                    |
|                                                                          | 4                | 13.24           | 3.79                                    |                                                                    | 4                  | 29.00           | 2.58                                    |
|                                                                          | 5                | 12.89           | 4.29                                    |                                                                    | 5                  | 28.74           | 2.93                                    |
|                                                                          | 6                | 12.80           | 3.71                                    |                                                                    | 6                  | 28.97           | 2.69                                    |
|                                                                          | 7                | 12.47           | 4.48                                    |                                                                    | 7                  | 28.99           | 2.95                                    |
|                                                                          | 8                | 13.67           | 3.85                                    |                                                                    | 8                  | 28.20           | 2.71                                    |
|                                                                          | 9                | 13.05           | 4.45                                    |                                                                    | 9                  | 28.14           | 2.98                                    |
|                                                                          | 10               | 13.13           | 3.69                                    |                                                                    | 10                 | 28.99           | 2.61                                    |
|                                                                          | 11               | 13.53           | 4.16                                    |                                                                    | 11                 | 28.96           | 3.06                                    |
|                                                                          | 12               | 12.94           | 3.73                                    |                                                                    | 12                 | 28.84           | 2.74                                    |
|                                                                          | Mean             | 13.03           | 4.03                                    |                                                                    | Mean               | 28.71           | 2.76                                    |
| Reproducibility ( $\pm 1\sigma$ )                                        | 0.34             | 0.31            | Reproducibility ( $\pm 1\sigma$ )       | 0.44                                                               | 0.18               |                 |                                         |

|                                    |      |      |                                    |      |      |
|------------------------------------|------|------|------------------------------------|------|------|
| Relative Standard Deviation (%RSD) | 2.58 | -    | Relative Standard Deviation (%RSD) | 1.52 | -    |
| Total Number of Analyses           | 12   | 12   | Total Number of Analyses           | 12   | 12   |
| Standard Error                     | 0.10 | 0.09 | Standard Error                     | 0.13 | 0.05 |

**Supplementary table 4: Primary Analytical Results of Hydrothermal Reference Materials**

| Material Description                             | Replicate Number                  | Sulphur (wt. %) | $\delta^{34}\text{S}_{\text{VCDT}}$ (‰) | Material Description                             | Number of Analyses                | Sulphur (wt. %) | $\delta^{34}\text{S}_{\text{VCDT}}$ (‰) |
|--------------------------------------------------|-----------------------------------|-----------------|-----------------------------------------|--------------------------------------------------|-----------------------------------|-----------------|-----------------------------------------|
| <b>GSJ JZn-1</b><br>(Skarn-type Pb-Zn Sulphides) | 1                                 | 1.26            | 2.33                                    | <b>GSJ JCu-1</b><br>(Skarn-type Fe-Cu Sulphides) | 1                                 | 6.97            | -0.79                                   |
|                                                  | 2                                 | 1.21            | 2.17                                    |                                                  | 2                                 | 6.80            | -0.66                                   |
|                                                  | 3                                 | 1.25            | 2.19                                    |                                                  | 3                                 | 6.85            | -0.80                                   |
|                                                  | 4                                 | 1.21            | 2.08                                    |                                                  | 4                                 | 6.84            | -0.81                                   |
|                                                  | 5                                 | 1.25            | 2.14                                    |                                                  | 5                                 | 6.89            | -0.77                                   |
|                                                  | 6                                 | 1.21            | 2.07                                    |                                                  | 6                                 | 6.60            | -0.82                                   |
|                                                  | 7                                 | 1.21            | 2.09                                    |                                                  | 7                                 | 6.86            | -0.78                                   |
|                                                  | 8                                 | 1.23            | 2.08                                    |                                                  | 8                                 | 6.49            | -0.83                                   |
|                                                  | 9                                 | 1.29            | 2.16                                    |                                                  | 9                                 | 5.80            | -0.91                                   |
|                                                  | 10                                | 1.23            | 2.18                                    |                                                  | 10                                | 6.65            | -0.88                                   |
|                                                  | 11                                | 1.24            | 2.17                                    |                                                  | 11                                | 6.74            | -1.16                                   |
|                                                  | 12                                | 1.18            | 2.03                                    |                                                  | 12                                | 7.74            | -0.84                                   |
|                                                  | Mean                              | 1.23            | 2.14                                    |                                                  | Mean                              | 6.77            | -0.84                                   |
|                                                  | Reproducibility ( $\pm 1\sigma$ ) | 0.03            | 0.08                                    |                                                  | Reproducibility ( $\pm 1\sigma$ ) | 0.43            | 0.12                                    |

|                                    |      |      |                                    |      |      |
|------------------------------------|------|------|------------------------------------|------|------|
| Relative Standard Deviation (%RSD) | 2.35 | -    | Relative Standard Deviation (%RSD) | 6.42 | -    |
| Total Number of Analyses           | 12   | 12   | Total Number of Analyses           | 12   | 12   |
| Standard Error                     | 0.01 | 0.02 | Standard Error                     | 0.13 | 0.03 |

**Supplementary table 5:** Repeated Analytical Results of USGS WMS-1a (Magmatic Reference Material)

| Batch    | Replicate Number                  | $\delta^{34}\text{S}_{\text{VCDT}}$ (‰) |
|----------|-----------------------------------|-----------------------------------------|
| <b>1</b> | 1                                 | -3.73                                   |
|          | 2                                 | -3.62                                   |
|          | 3                                 | -3.41                                   |
|          | 4                                 | -3.53                                   |
|          | 5                                 | -3.56                                   |
|          | Mean                              | -3.57                                   |
|          | Reproducibility ( $\pm 1\sigma$ ) | 0.12                                    |

|                          |      |
|--------------------------|------|
| Total Number of Analyses | 5    |
| Standard Error           | 0.05 |

**Supplementary table 6:** Repeated Analytical Results of USGS SU-1b (Magmatic Reference Material)

| Batch          | Replicate Number                   | $\delta^{34}\text{S}_{\text{VCDT}}$ (‰) | Batch    | Number of Analyses                 | $\delta^{34}\text{S}_{\text{VCDT}}$ (‰) |
|----------------|------------------------------------|-----------------------------------------|----------|------------------------------------|-----------------------------------------|
| <b>1</b>       | 1                                  | 3.79                                    | <b>2</b> | 1                                  | 3.78                                    |
|                | 2                                  | 3.78                                    |          | 2                                  | 3.59                                    |
|                | 3                                  | 3.92                                    |          | 3                                  | 3.62                                    |
|                | 4                                  | 3.85                                    |          | 4                                  | 3.77                                    |
|                | 5                                  | 3.86                                    |          | 5                                  | 3.64                                    |
|                | –                                  | –                                       |          | 6                                  | 3.58                                    |
|                | Mean                               | 3.84                                    |          | Mean                               | 3.66                                    |
|                | Reproducibility ( $\pm 1\sigma$ )  | 0.06                                    |          | Reproducibility ( $\pm 1\sigma$ )  | 0.09                                    |
|                | Relative Standard Deviation (%RSD) | –                                       |          | Relative Standard Deviation (%RSD) | –                                       |
|                | Total Number of Analyses           | 5                                       |          | Total Number of Analyses           | 6                                       |
| Standard Error | 0.03                               | Standard Error                          | 0.04     |                                    |                                         |

**Supplementary table 7:** Repeated Analytical Results of GSJ JZn-1 (Hydrothermal Reference Material)

| Batch                    | Replicate Number                  | $\delta^{34}\text{S}_{\text{VCDT}}$ (‰) | Batch    | Number of Analyses                | $\delta^{34}\text{S}_{\text{VCDT}}$ (‰) | Batch    | Number of Analyses                | $\delta^{34}\text{S}_{\text{VCDT}}$ (‰) |
|--------------------------|-----------------------------------|-----------------------------------------|----------|-----------------------------------|-----------------------------------------|----------|-----------------------------------|-----------------------------------------|
| <b>1</b>                 | 1                                 | 2.43                                    | <b>2</b> | 1                                 | 2.48                                    | <b>3</b> | 1                                 | 2.45                                    |
|                          | 2                                 | 2.39                                    |          | 2                                 | 2.60                                    |          | 2                                 | 2.25                                    |
|                          | 3                                 | 2.80                                    |          | 3                                 | 2.59                                    |          | 3                                 | 2.33                                    |
|                          | 4                                 | 2.69                                    |          | 4                                 | 2.69                                    |          | 4                                 | 2.38                                    |
|                          | –                                 | –                                       |          | 5                                 | 2.96                                    |          | 5                                 | 2.38                                    |
|                          | –                                 | –                                       |          | –                                 | –                                       |          | 6                                 | 2.39                                    |
|                          | Mean                              | 2.58                                    |          | Mean                              | 2.66                                    |          | Mean                              | 2.36                                    |
|                          | Reproducibility ( $\pm 1\sigma$ ) | 0.20                                    |          | Reproducibility ( $\pm 1\sigma$ ) | 0.18                                    |          | Reproducibility ( $\pm 1\sigma$ ) | 0.07                                    |
| Total Number of Analyses | 4                                 | Total Number of Analyses                | 5        | Total Number of Analyses          | 6                                       |          |                                   |                                         |
| Standard Error           | 0.10                              | Standard Error                          | 0.08     | Standard Error                    | 0.03                                    |          |                                   |                                         |
